# Supplementary material for: KRAS Prenylation Is Required for Bivalent Binding with Calmodulin in a Nucleotide-Independent Manner
Source: PubMed Central journal article supplement — Biophys J. 2019 Feb 15;116(6):1049–63. doi: 10.1016/j.bpj.2019.02.004 (PMC6428923; doi:10.1016/j.bpj.2019.02.004), 2019-02-15

**Biophysical Journal, Volume 116**

**Supplemental Information**

**KRAS Prenylation Is Required for Bivalent Binding with Calmodulin in a Nucleotide-Independent Manner**

**Constance Agamasu, Rodolfo Ghirlando, Troy Taylor, Simon Messing, Timothy H. Tran, Lakshman Bindu, Marco Tonelli, Dwight V. Nissley, Frank McCormick, and Andrew G. Stephen**

**Table S1:** Characterization of components studied by sedimentation velocity

**Table S2:** Summary of binding parameters obtained of CaM binding to GDP-bound KRAS4b variants via SV-AUC, SPR and ITC

**Table S3.** Summary of binding affinities obtained for CaM binding to various KRAS4b constructs via ITC

**Figure S1.** *Unprenylated GDP and GNP-bound KRAS4b do not interact with CaM* (A) Sedimentation velocity absorbance  $c(s)$  profiles obtained for individual CaM and KRAS4b variants at 70  $\mu\text{M}$  CaM (cyan) and  $\sim 10$   $\mu\text{M}$  GDP and GNP-bound KRAS4b-FMe, KRAS4b 2-185 and KRAS4b 2-169. (B) Sedimentation velocity absorbance  $c(s)$  profiles for mixtures of 30  $\mu\text{M}$  CaM and 20  $\mu\text{M}$  GDP and GNP-bound KRAS4b constructs as indicated. Faster sedimenting species was only observed for CaM and GDP and GNP-bound KRAS4b-FMe. (C) ITC heat of dilution data acquired upon injection of buffer into 30  $\mu\text{M}$  KRAS4b-FMe and 1 mM CaM into buffer. (D) ITC data obtained for CaM (1 mM) titrated into GDP and GNP-bound KRAS4b 2-185 (30  $\mu\text{M}$ ).

**Figure S2.** *Prenylated GDP and GNP-bound KRAS4b-FMe forms a 2:1 complexes with CaM.* Absorbance (top panel) and interference (bottom panel) sedimentation velocity  $c(s)$  profiles for the titration of (A) CaM into 6  $\mu\text{M}$  GDP-bound KRAS4b-FMe, CaM into 3  $\mu\text{M}$  GDP-bound KRAS4b-FMe, and GDP-bound KRAS4b-FMe into 6  $\mu\text{M}$  CaM, (B) CaM-C into 3  $\mu\text{M}$  GDP-bound KRAS4b-FMe and (C) CaM-N into 3  $\mu\text{M}$  GDP-bound KRAS4b-FMe at the concentrations indicated. The weighted-average sedimentation coefficient  $S_w$  used for analysis in Figure 2 is obtained by integration of the  $c(s)$  profiles shown.

**Figure S3.** *NMR data further supports that unprenylated GDP and GNP-bound KRAS4b do not interact with CaM.* 2D  $^1\text{H}$ - $^{15}\text{N}$  HSQC of  $^{15}\text{N}$ -labeled GDP and GNP-bound KRAS4b2-185 at 50  $\mu\text{M}$  titrated with 500  $\mu\text{M}$  CaM. Again, no CSP or line broadening was observed between unprenylated KRAS4b and CaM.

**Figure S4.** *NMR data of GDP-bound KRAS4b-FMe binding to CaM-C and CaM-N.* (A) 2D  $^1\text{H}$ - $^{15}\text{N}$  HSQC of  $^{15}\text{N}$ -labeled CaM-N titrated with GDP-bound KRAS4b-FMe at a 1.5:1 ratio. (B) 2D  $^1\text{H}$ - $^{15}\text{N}$  HSQC of  $^{15}\text{N}$ -labeled CaM-C titrated with GDP-bound KRAS4b-FMe at a 1.5:1 ratio. (C-D) A histogram of normalized  $^1\text{H}$ - $^{15}\text{N}$  chemical shift changes vs. residue number calculated from the HSQC spectra for CaM-N and CaM-C upon addition of GDP-bound KRAS4b-FMe. (E-F) Cartoon representation of CaM structure (PDB ID: 3CLN) highlighting residues that exhibited substantial ( $>0.05$  ppm) chemical shift changes for CaM-N (red) or CaM-C (magenta).

**Figure S5.** *NMR data further supports that unprenylated GDP and GNP-bound KRAS4b do not interact with CaM.* 2D  $^1\text{H}$ - $^{15}\text{N}$  HSQC of  $^{15}\text{N}$ -labeled CaM at 50  $\mu\text{M}$  titrated with 500  $\mu\text{M}$  upon titration of unprenylated KRAS4b into CaM.

**Figure S6.** *KSKTKC-FMe does not induce secondary structural rearrangements in CaM.* FarUV circular dichroism spectra obtained for CaM (magenta) and the KSKTKC-FMe: CaM complex (green).

**Table S1:** Characterization of components studied by sedimentation velocity.

| Component                       | Concentration studied ( $\mu\text{M}$ ) | $S_{20,w}$ (S) | $M$ (kDa) |
|---------------------------------|-----------------------------------------|----------------|-----------|
| CaM                             | 70                                      | 2.0            | 18        |
| CaM-N                           | 110                                     | 1.4            | 10        |
| CaM-C                           | 25                                      | 1.5            | 13        |
| GDP KRAS4b-FMe                  | 10                                      | 2.2            | 23        |
| GNP KRAS4b-FMe                  | 10                                      | 2.2            | 22        |
| GDP KRAS4b 2-185                | 10                                      | 2.2            | 23        |
| GNP KRAS4b 2-185                | 10                                      | 2.2            | 23        |
| GDP KRAS4b 2-169                | 10                                      | 2.2            | 21        |
| GNP KRAS4b 2-169                | 10                                      | 2.3            | 21        |
| MSP1D1 POPC:POPS 70:30 Nanodisc | 4.5                                     | 3.1            | 84        |

**Table S2:** Summary of binding parameters obtained of CaM binding to GDP-bound KRAS4b variants via SV-AUC, SPR and ITC

| Technique | Sample 1 | Sample 2   | Kd ( $\mu\text{M}$ ) | $\Delta\text{H}$<br>(kcal/mol) | $-\text{T}\Delta\text{S}$<br>(kcal/mol) | $\Delta\text{G}$<br>(kcal/mol) |
|-----------|----------|------------|----------------------|--------------------------------|-----------------------------------------|--------------------------------|
| SV-AUC    | CaM      | KRAS4b-FMe | Co-Op*               |                                |                                         |                                |
| SV-AUC    | CaM-C    | KRAS4b-FMe | $0.4 \pm 0.1$        |                                |                                         |                                |
| SV-AUC    | CaM-N    | KRAS4b-FMe | $4 \pm 1$            |                                |                                         |                                |
| SPR       | CaM      | KRAS4b-FMe | $0.4 \pm 0.1$        |                                |                                         |                                |
| SPR       | CaM-C    | KRAS4b-FMe | $0.6 \pm 0.1$        |                                |                                         |                                |
| SPR       | CaM-N    | KRAS4b-FMe | $3 \pm 0.2$          |                                |                                         |                                |
| ITC       | CaM      | KRAS4b-FMe | $0.3 \pm 0.1$        |                                |                                         |                                |
| ITC       | CaM-C    | KRAS4b-FMe | $0.5 \pm 0.1$        | $-5.1 \pm 0.3$                 | -3.5                                    | -8.6                           |
| ITC       | CaM-N    | KRAS4b-FMe | $4 \pm 1$            | $-7.3 \pm 0.5$                 | -0.2                                    | -7.5                           |

Co-op\* Data were modeled in terms of two non-symmetric sites with microscopic binding constants. The microscopic binding constants observed for binding to CaM-N and CaM-C were applied and fixed to obtain a favorable co-operative term.

**Table S3:** Summary of binding affinities obtained for CaM binding to various KRAS4b constructs via ITC

| Cell                                     | Syringe             | $K_d$                          |
|------------------------------------------|---------------------|--------------------------------|
| KRAS4b-FMe (44 $\mu$ M)                  | CaM (120 $\mu$ M)   | 0.3 $\mu$ M $\pm$ 0.08 $\mu$ M |
| KRAS4b-FMe (30 $\mu$ M)                  | CaM-C (300 $\mu$ M) | 0.5 $\mu$ M $\pm$ 0.07 $\mu$ M |
| KRAS4b-FMe (30 $\mu$ M)                  | CaM-N (500 $\mu$ M) | 4 $\mu$ M $\pm$ 1 $\mu$ M      |
| KRAS4b-Farnesyl (57 $\mu$ M)             | CaM (300 $\mu$ M)   | 2 $\mu$ M $\pm$ 0.2 $\mu$ M    |
| KRAS4b-2-180-AAAAC-Farnesyl (48 $\mu$ M) | CaM (440 $\mu$ M)   | 10 $\mu$ M $\pm$ 1 $\mu$ M     |
| HVR-FMe (50 $\mu$ M)                     | CaM (150 $\mu$ M)   | 0.3 $\mu$ M $\pm$ 0.06 $\mu$ M |
| KSKTKC-FMe (50 $\mu$ M)                  | CaM (130 $\mu$ M)   | 0.4 $\mu$ M $\pm$ 0.1 $\mu$ M  |
| KSKTKC-GMe (30 $\mu$ M)                  | CaM (200 $\mu$ M)   | 3 $\mu$ M $\pm$ 0.01 $\mu$ M   |
| KSKTKC-PMe (30 $\mu$ M)                  | CaM (800 $\mu$ M)   | 30 $\mu$ M $\pm$ 3 $\mu$ M     |
| GDP KRAS4b 2-185 (30 $\mu$ M)            | CaM (1 mM)          | ND *                           |
| GNP KRAS4b 2-185 (30 $\mu$ M)            | CaM (1 mM)          | ND *                           |

ND\* No binding detected.

Figure S1

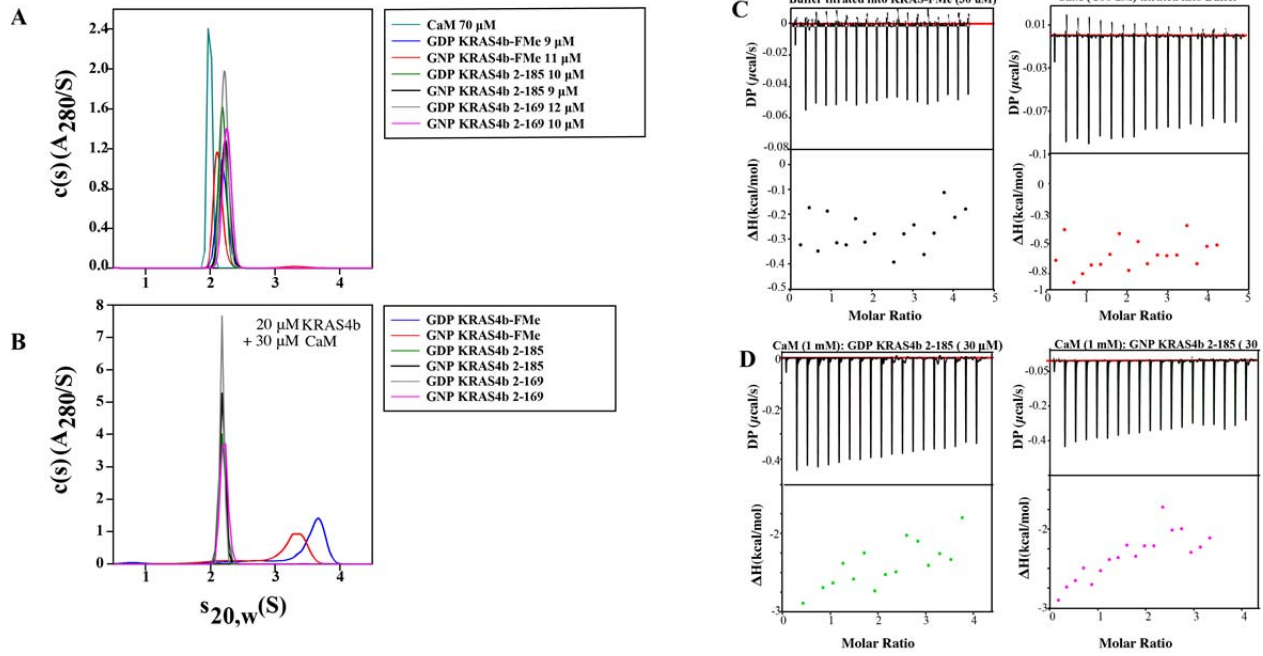

Figure S2

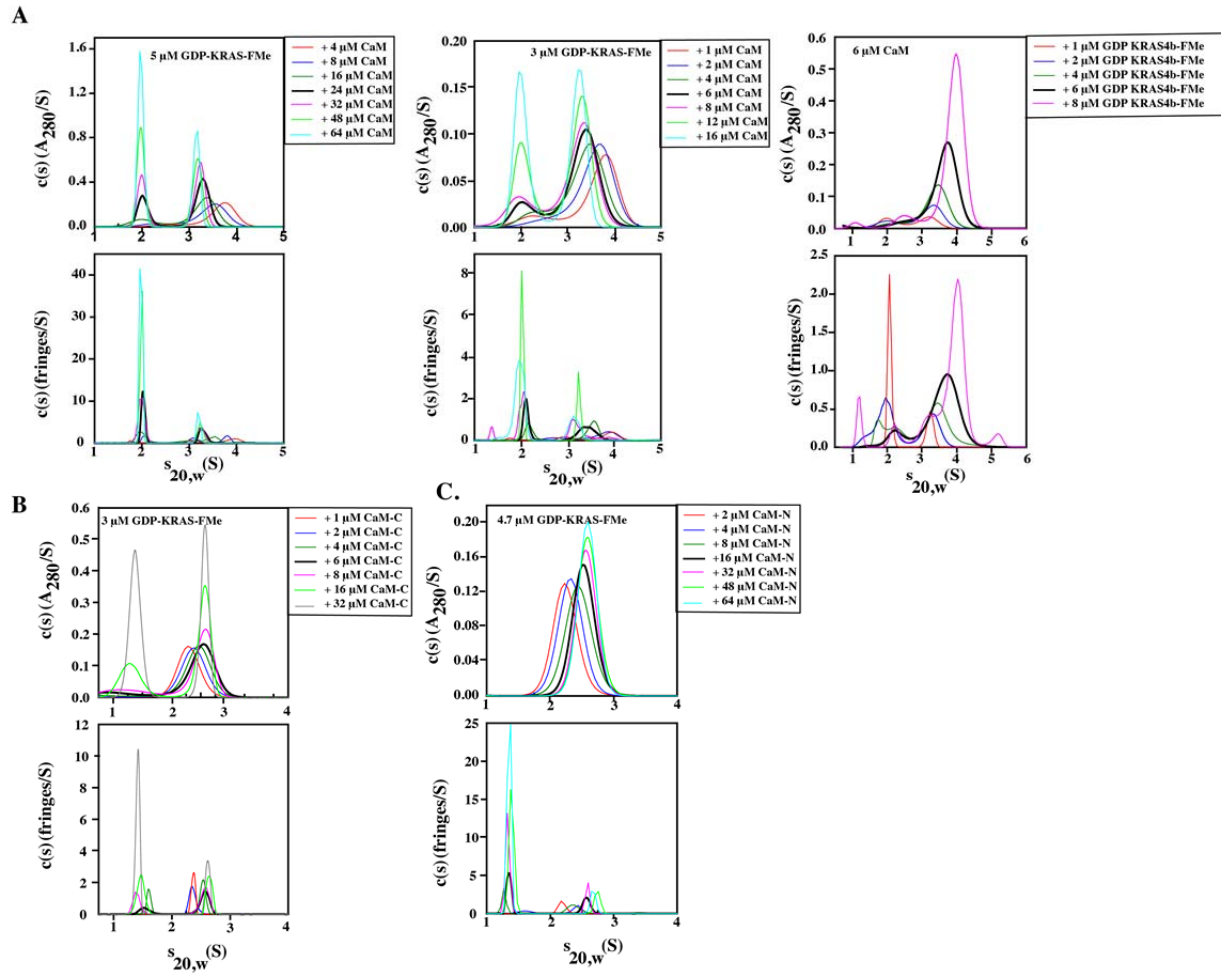

Figure S3

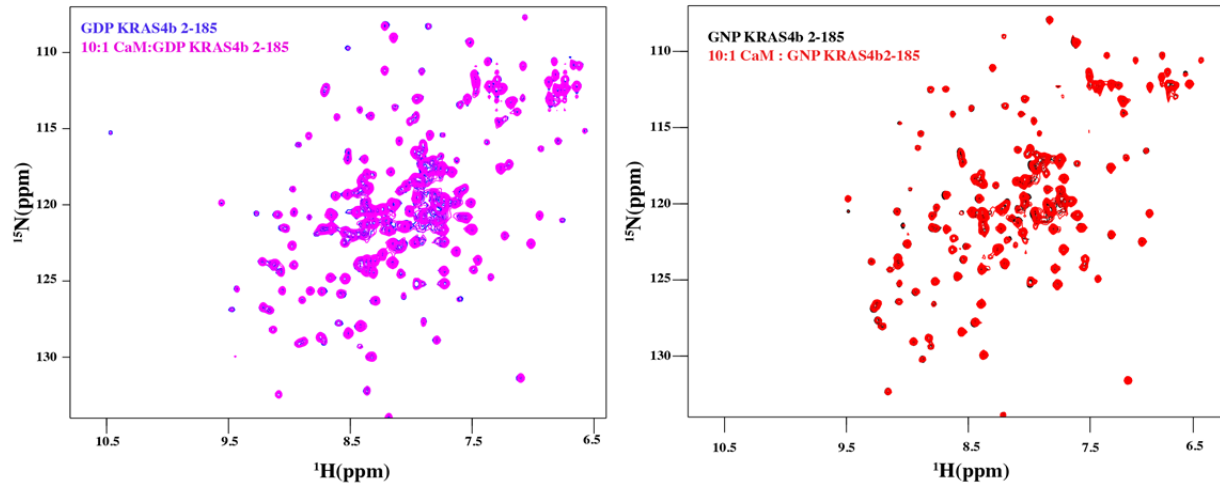



Figure S4

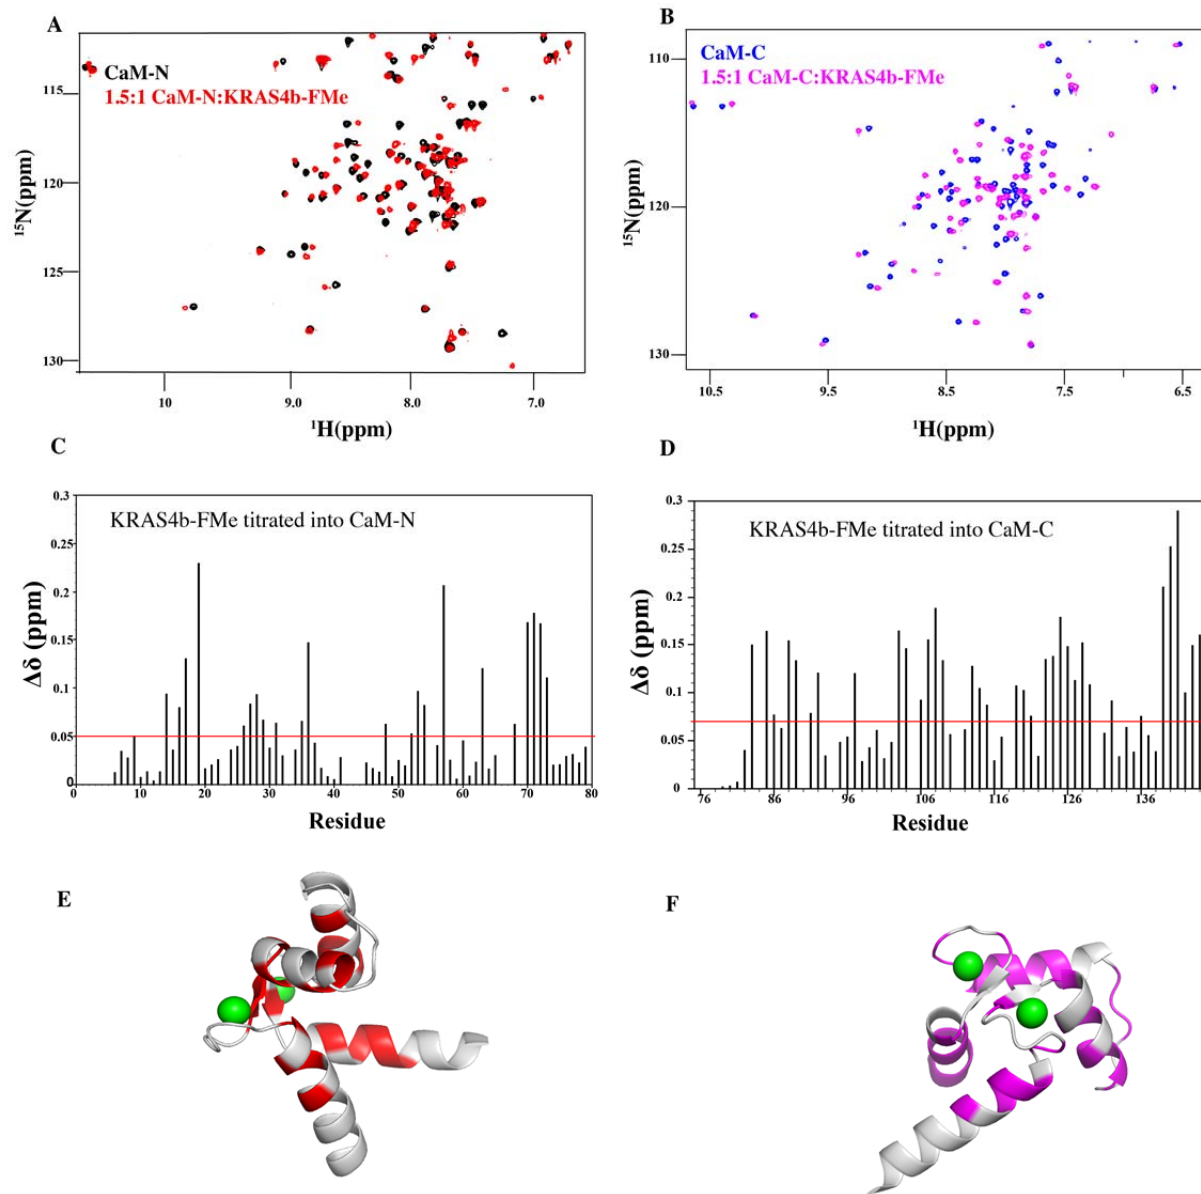

Figure S5

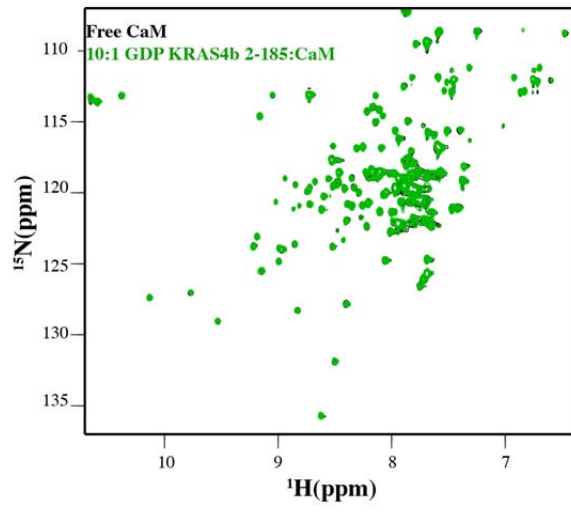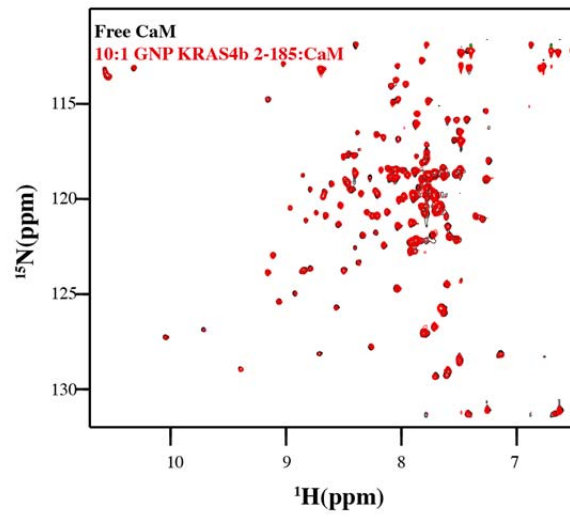

Figure S6

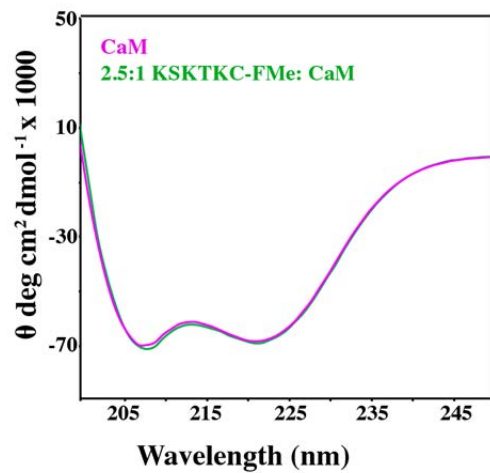

Supplement: mmc1.pdf [file mmc1.pdf]
